# Supplementary material for: Microbiome–Metabolomic Analysis Reveals Beneficial Effects of Dietary Kelp Resistant Starch on Intestinal Functions of Hybrid Snakeheads (Channa maculata ♀ × Channa argus ♂)
Source: MDPI journal article supplement (doi:10.3390/antiox12081631), 2023-08-18
Supplement: s1 [file s1]

**Microbiome-metabolomic analysis reveals beneficial effects of dietary  
kelp resistant starch on intestinal functions of hybrid snakeheads  
(*Channa maculata* ♀ × *Channa argus* ♂).**

Shaodan Wang<sup>1,2</sup>, Zhiheng Zuo<sup>2</sup>, Bin Ye<sup>2</sup>, Li Zhang<sup>1</sup>, Yanbo Cheng<sup>1</sup>, Shaolin Xie<sup>2</sup>,  
Jixing Zou<sup>2\*\*</sup>, Guohuan Xu<sup>1\*</sup>

<sup>1</sup>State Key Laboratory of Applied Microbiology Southern China, Guangdong Provincial Key Laboratory of Microbial Culture Collection and Application, Institute of Microbiology, Guangdong Academy of Sciences, Guangzhou 510070, China.

<sup>2</sup>Joint Laboratory of Guangdong province and Hong Kong region on Marine Bioresource Conservation and Exploitation, College of Marine Sciences, South China Agricultural University, Guangzhou 510642, China.

\*Correspondence: \*Guohuan Xu, State Key Laboratory of Applied Microbiology Southern China, Guangdong Provincial Key Laboratory of Microbial Culture Collection and Application, Institute of Microbiology, Guangdong Academy of Sciences, Guangzhou 510070, China; E-mail: [xghfish@163.com](mailto:xghfish@163.com). \*\*Jixing Zou, College of Marine Sciences, South China Agricultural University, Guangzhou, 510642, China; Tel/fax: +86-20-87571321; E-mail: [zoujixing@scau.edu.cn](mailto:zoujixing@scau.edu.cn).

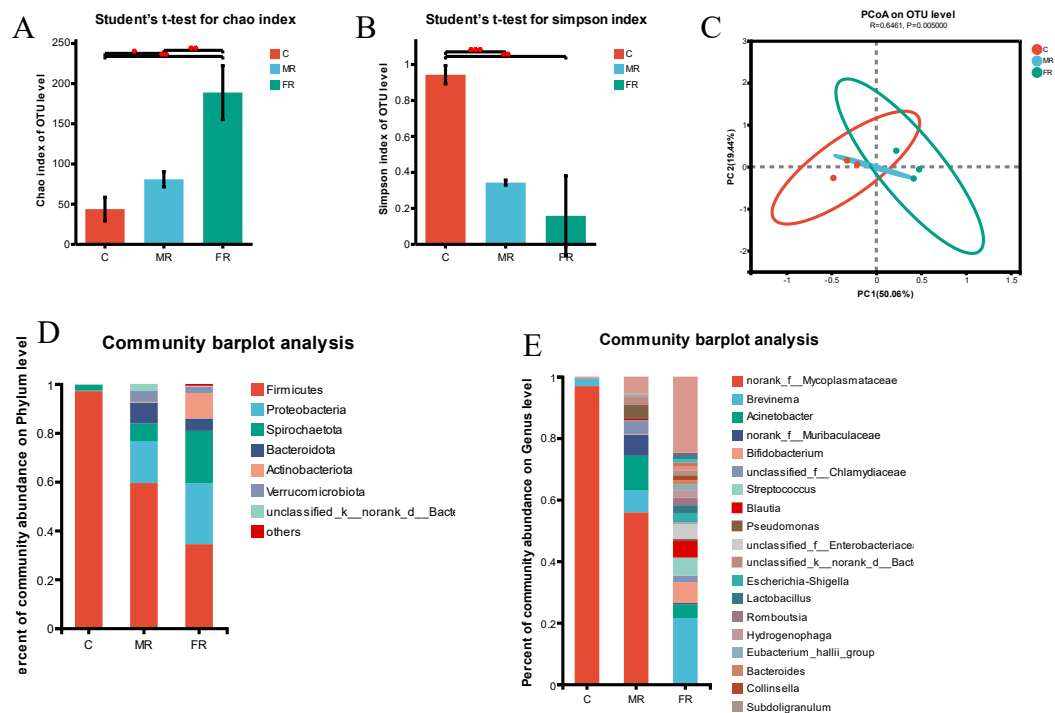

Figure S1 Dietary resistant starch modifies the composition of the intestinal microbial population. (A) Chao1 index of OTU levels. (B) Simpson index of OTU levels. (C) Principal Component Analysis (PCoA). (D) Species composition at the phylum level in different groups. (E) Species composition at the genus level in different groups. Values are expressed as means  $\pm$  SD. \* Indicates significant difference (\*  $P < 0.05$ , \*\*  $P < 0.01$ , \*\*\*  $P < 0.001$ ).

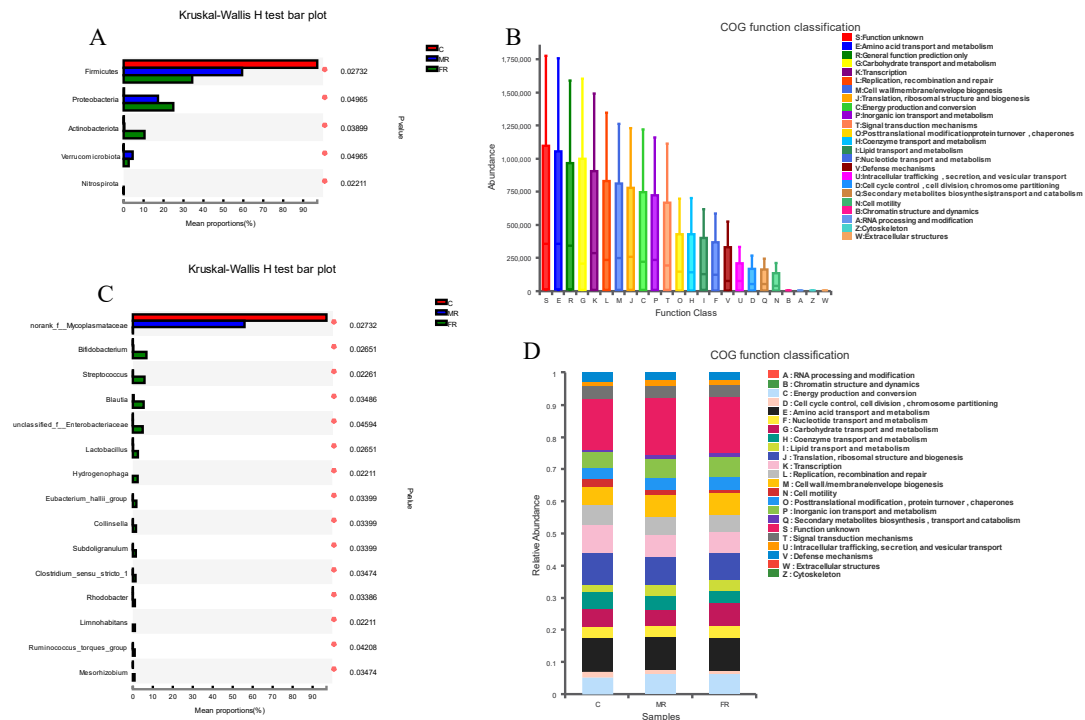

Figure S2 Significant variability and functional prediction of intestinal microbes. (A) Significant differences in species at the phylum level. (B) COG functional classification statistical histogram. (C) Significant differences in species at the genus level. (D) COG functional classification statistics box plot. \* Indicates significant difference ( $P < 0.05$ ).

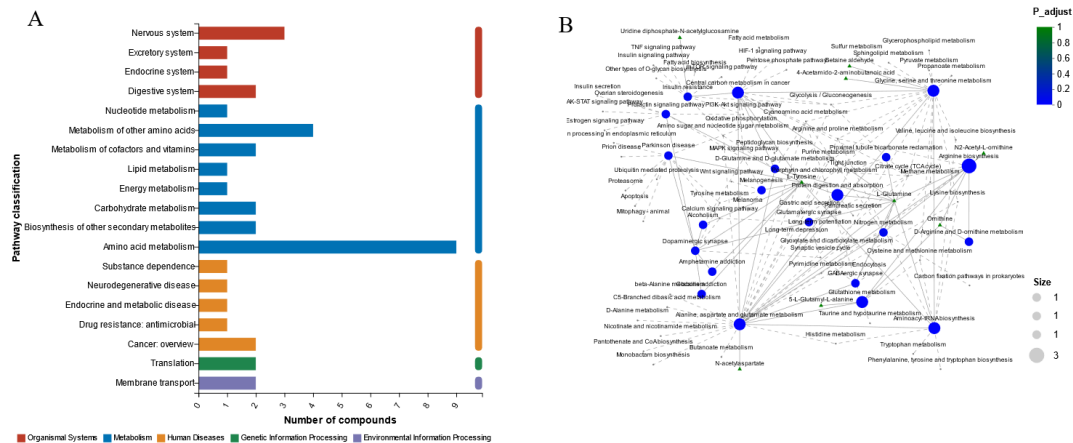

Figure S3 KEGG-based pathway prediction. (A) KEGG pathway enrichment of differential metabolites. (A) KEGG network diagram of differential metabolites.

37 Table S1 Information on the origin of feed ingredients.

| Ingredients                  | Source                                                      |
|------------------------------|-------------------------------------------------------------|
| Fish meal (67 %)             | New Hope Company (Guangzhou, China)                         |
| Casein                       | Shengruiyuan Biotechnology Co., Ltd (Wuhan, China)          |
| Soybean meal                 | New Hope Company (Guangzhou, China)                         |
| Lecithin High Potency        | New Hope Company (Guangzhou, China)                         |
| Calcium dihydrogen phosphate | New Hope Company (Guangzhou, China)                         |
| Choline chloride (50 %)      | New Hope Company (Guangzhou, China)                         |
| Vitamin C                    | New Hope Company (Guangzhou, China)                         |
| Fish oil                     | New Hope Company (Guangzhou, China)                         |
| Microcrystalline cellulose   | Nuofan Biotechnology Co., Ltd (Wuhan, China)                |
| High-gluten flour            | New Hope Company (Guangzhou, China)                         |
| resistant starch (kelp meal) | Tiannong Fruit and Vegetable Food Co., Ltd (Xinghua, China) |
| Binder (KGM, Glucomannan)    | Fengbai Biotechnology Co., Ltd (Shandong, China)            |

38

39

40 Table S2 Preparation and staining of paraffin sections.

| Program                          | Step                                                   | Condition |
|----------------------------------|--------------------------------------------------------|-----------|
| Fixed                            | Samples were collected and fixed with paraformaldehyde | 24 h      |
|                                  | 75 % Alcohol                                           | 4 h       |
|                                  | 85 % Alcohol                                           | 2 h       |
|                                  | 90 % Alcohol                                           | 2 h       |
|                                  | 95 % Alcohol                                           | 1 h       |
| Tissue dehydration transparent   | 100 % Alcohol 1st time                                 | 30 min    |
|                                  | 100 % alcohol 2nd time                                 | 30 min    |
|                                  | Alcohol benzene                                        | 5-10 min  |
|                                  | Xylene 1st time                                        | 5-10 min  |
|                                  | Xylene 2nd time                                        | 5-10 min  |
|                                  | 65 °C melted paraffin 1st time                         | 1 h       |
| Wax through                      | 65 °C melted paraffin 2nd time                         | 1 h       |
|                                  | 65 °C Melted paraffin 3rd time                         | 1 h       |
| Embedding                        | Embedding                                              |           |
| Slice                            | Slice                                                  | 4 µm      |
| Patch                            | Smear glycerin protein, scoop flakes                   |           |
| Baked slices                     | 37 °C Oven                                             | 12 h      |
|                                  | Xylene 1st time                                        | 20 min    |
|                                  | Xylene 2nd time                                        | 20 min    |
|                                  | 100 % Alcohol 1st time                                 | 5 min     |
| Section dewaxing and rehydration | 100 % alcohol 2nd time                                 | 5 min     |
|                                  | 75 % Alcohol                                           | 5 min     |
|                                  | Distilled water                                        | 3 min     |
| Hematoxylin                      | Hematoxylin                                            | 3-5 min   |

| Program                           | Step                                  | Condition |
|-----------------------------------|---------------------------------------|-----------|
| staining                          | staining                              |           |
|                                   | Rinse with tap water                  |           |
|                                   | Differentiation fluid differentiation | 3-5 s     |
|                                   | Rinse with tap water                  |           |
|                                   | Back to blue liquid back to blue      | 5-10 s    |
|                                   | Rinse with tap water                  |           |
|                                   | 85 % Alcohol                          | 5 min     |
| Eosin staining                    | 95 % Alcohol                          | 5 min     |
|                                   | Eosin stain                           | 5 min     |
|                                   | 100 % Alcohol 1st time Alcohol        | 5 min     |
|                                   | 100 % alcohol 2nd time                | 5 min     |
| Dehydrated and transparent slices | 100 % Alcohol 3rd time                | 5 min     |
|                                   | Xylene 1st time                       | 5 min     |
|                                   | Xylene 2nd time                       | 5 min     |
| Mount                             | Gum                                   |           |
| Baked slices                      | 37 °C Oven                            | 24 h      |
